# Supplementary material for: Divinyl Sulfone Cross-Linked Cyclodextrin-Based Polymeric Materials: Synthesis and Applications as Sorbents and Encapsulating Agents
Source: PubMed Central journal article supplement (PMC6272569; doi:10.3390/molecules20033565), 2015-02-19
Supplement: molecules-20-03565-s001.pdf [file molecules-20-03565-s001.pdf]

## Supplementary Materials

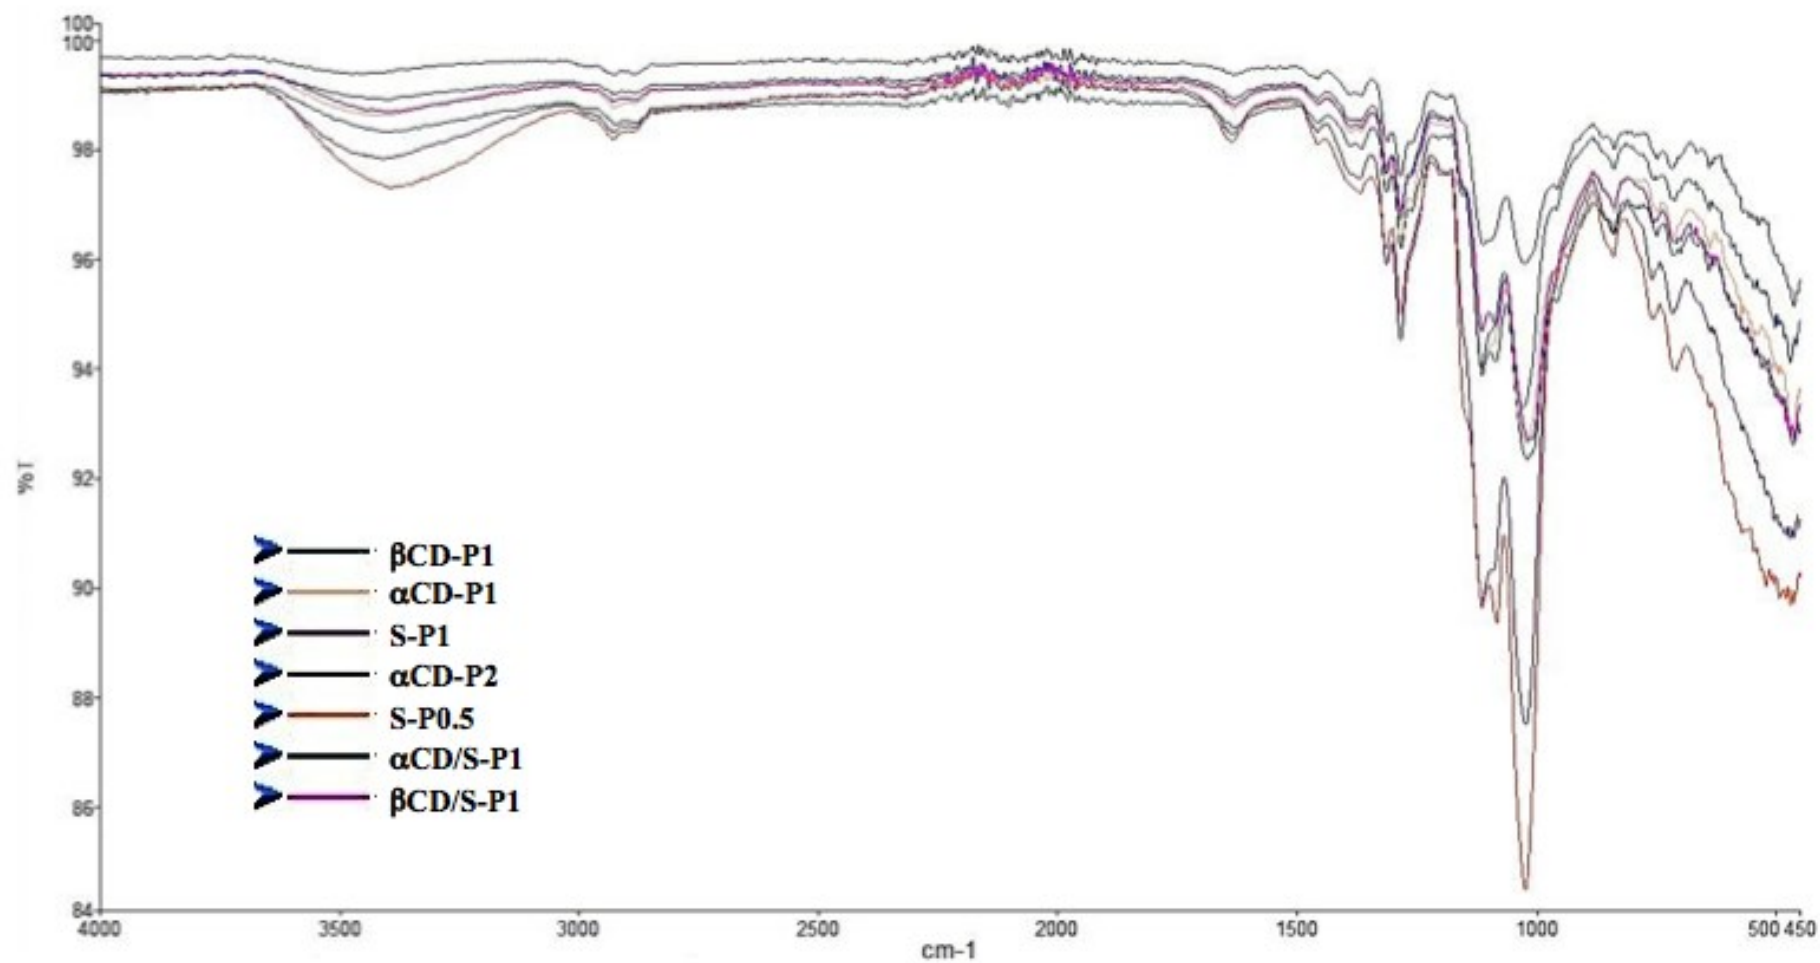

Figure S1. ATR-IR spectra for homo- and hetero-CDPs.

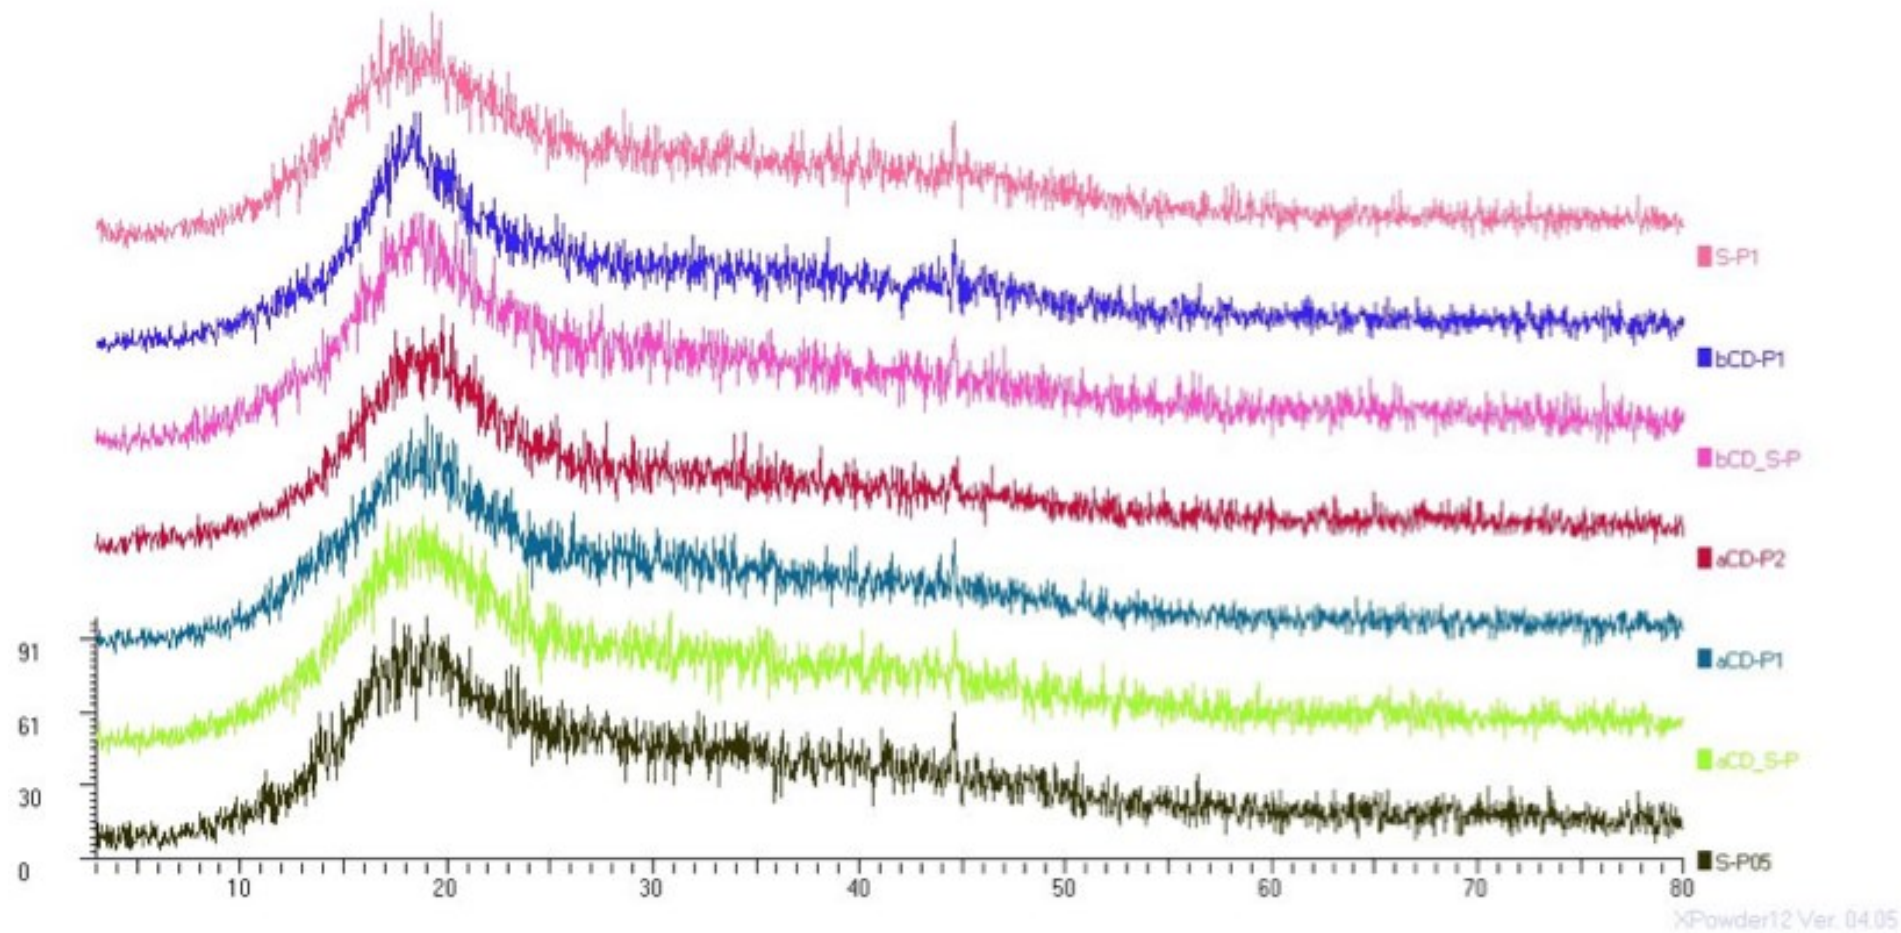

**Figure S2.** X-ray diffraction pattern for the polymers resulting from homo- and hetero DVS cross-linked CDPs.

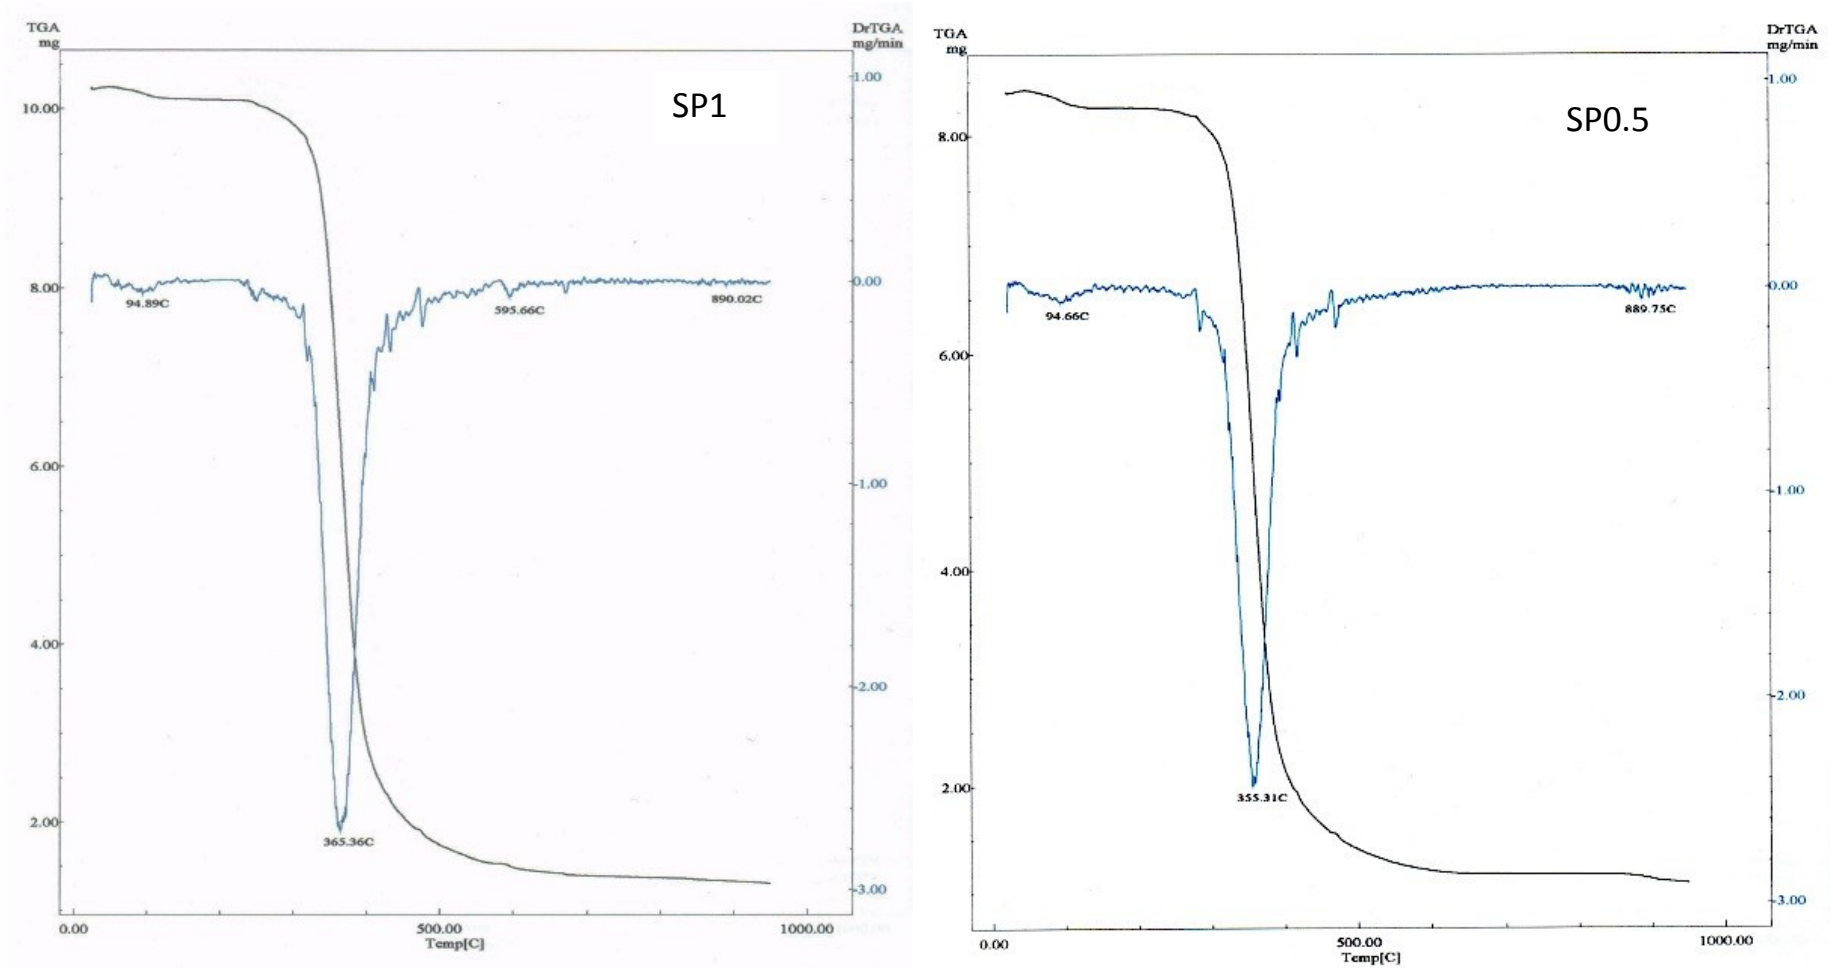

Figure S3. Cont.

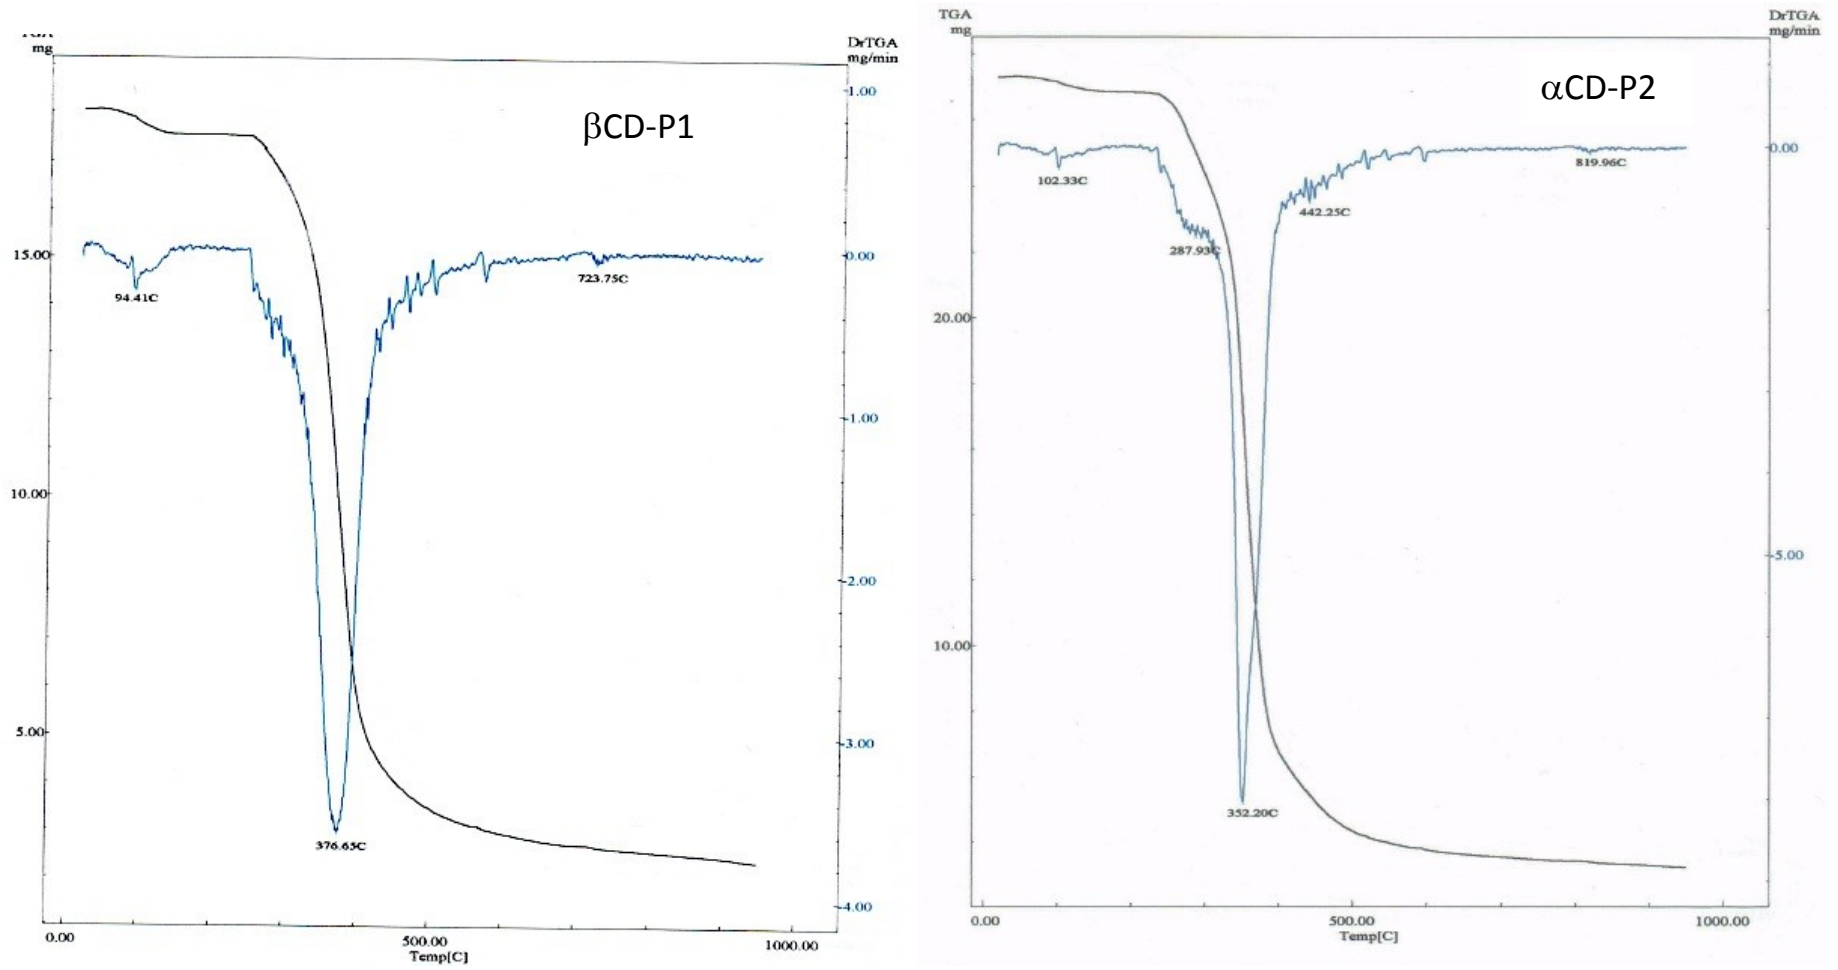

Figure S3. Cont.

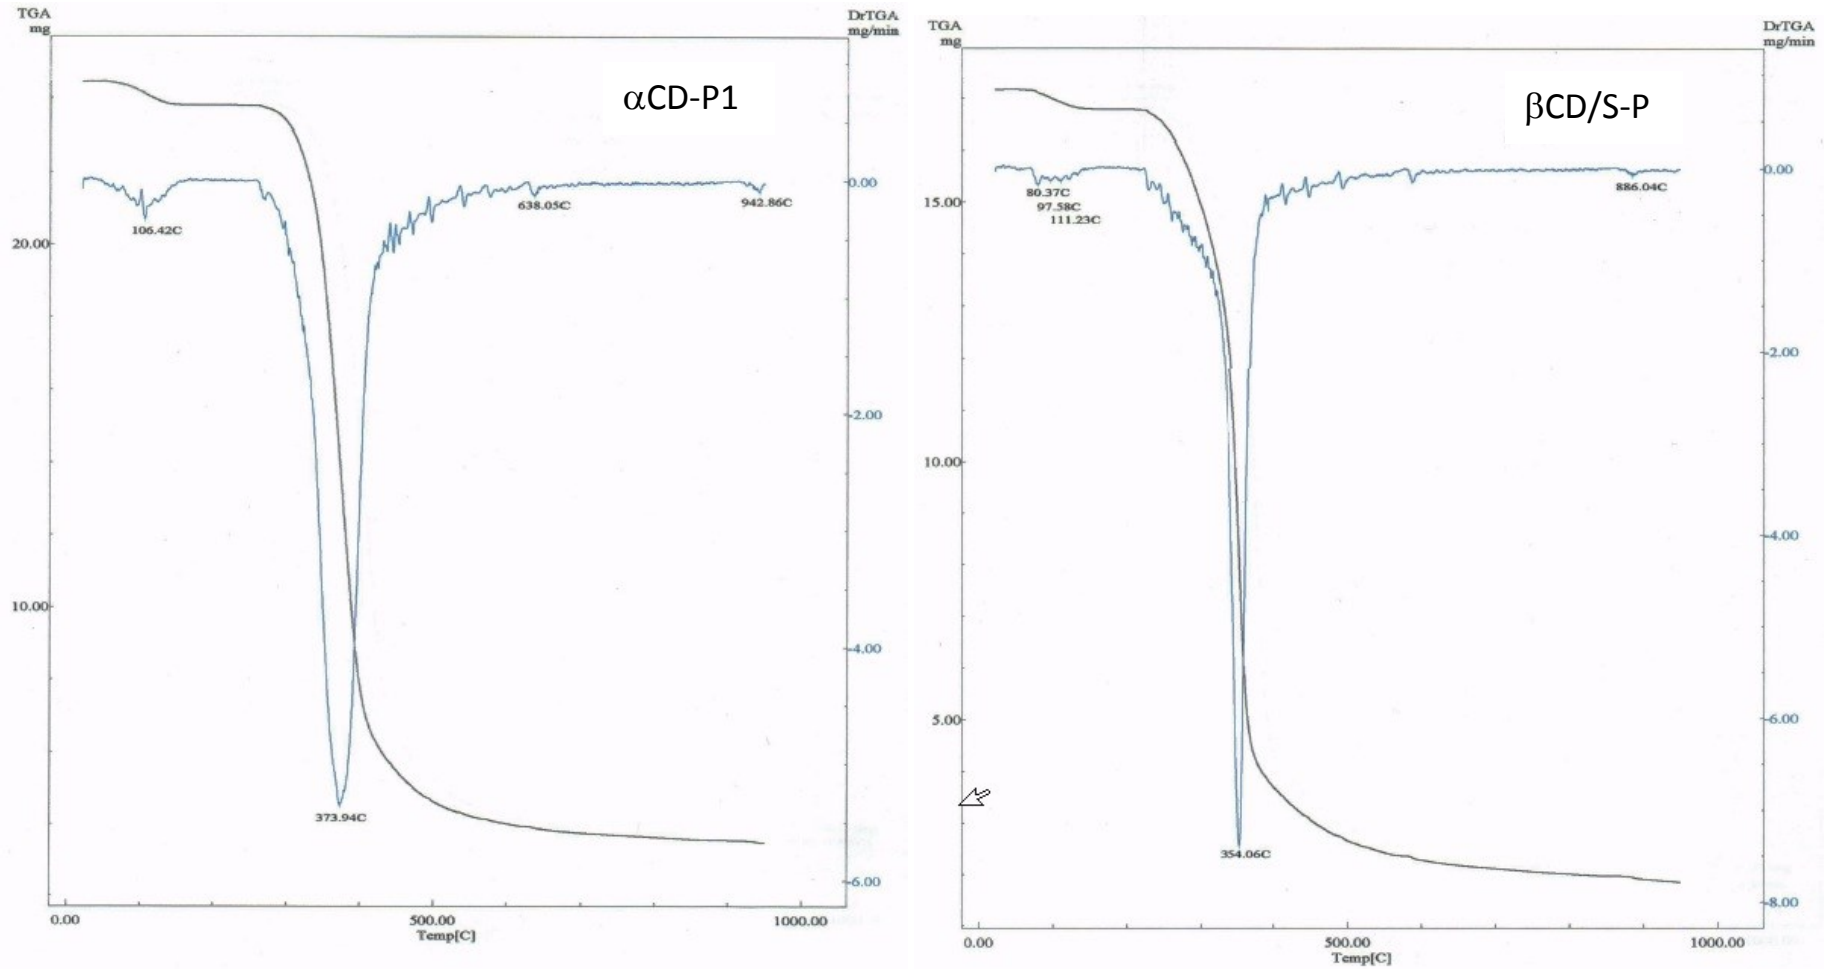

Figure S3. Cont.

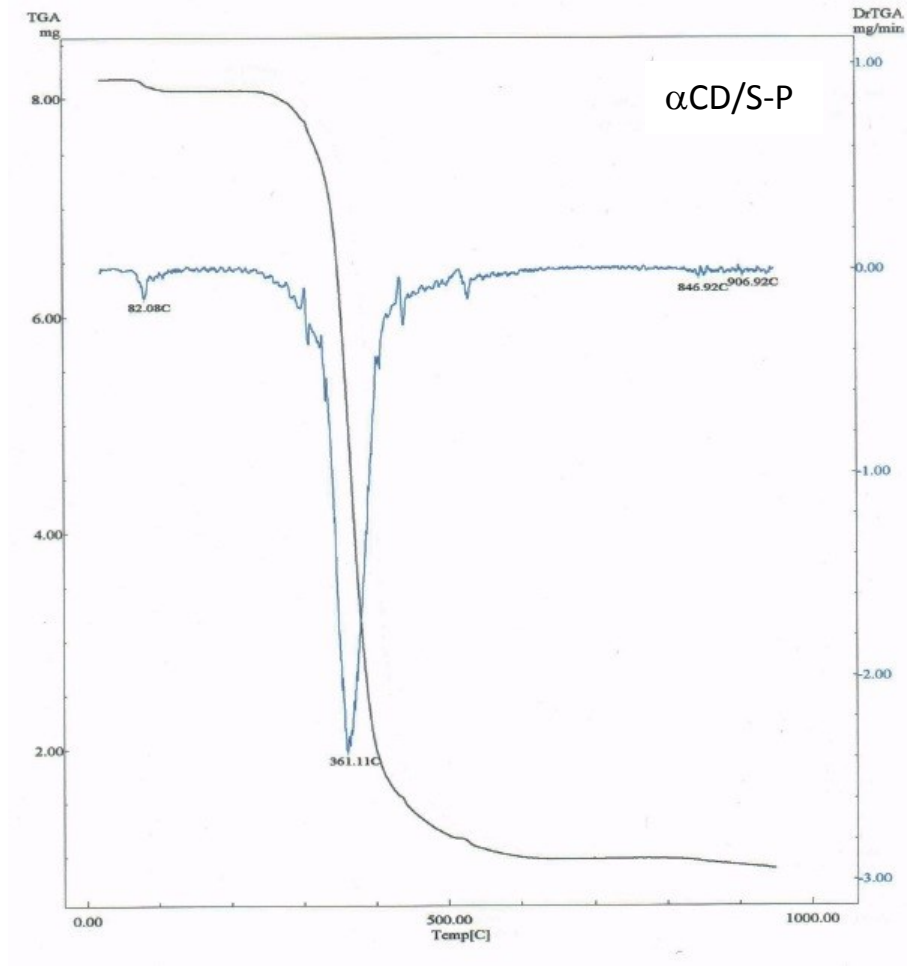

Figure S3. TGA for homo- and hetero-polymers.

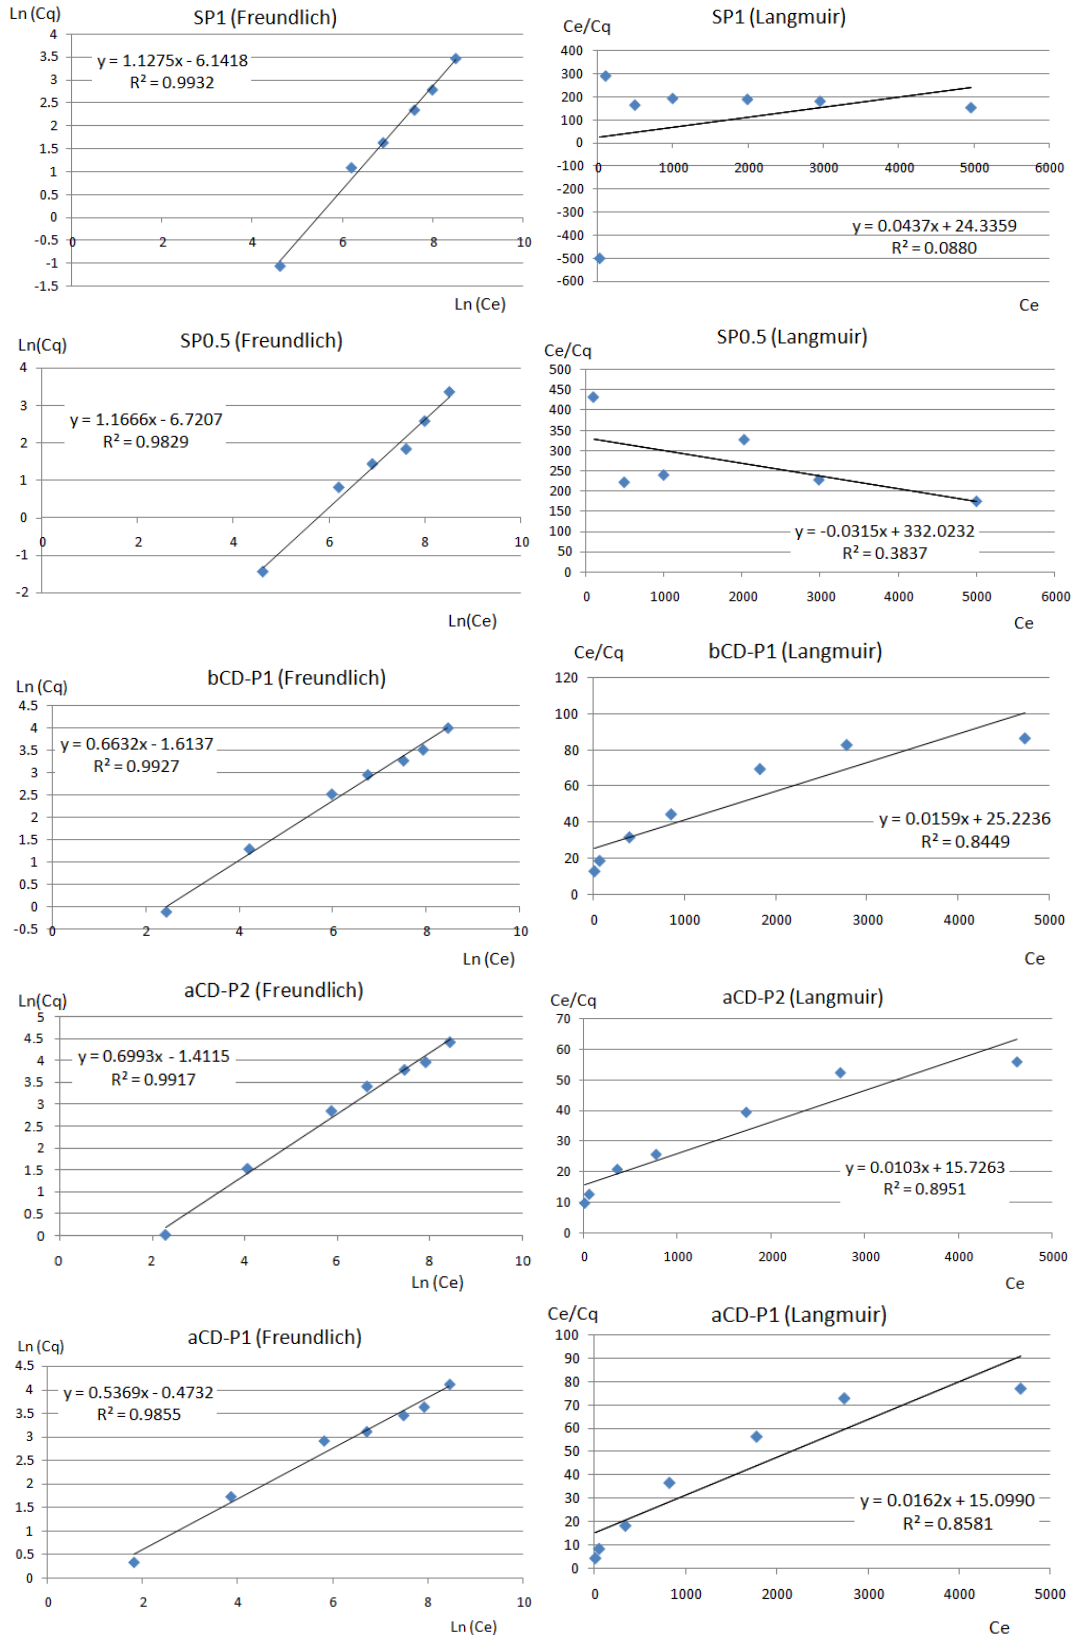

Figure S4. Cont.

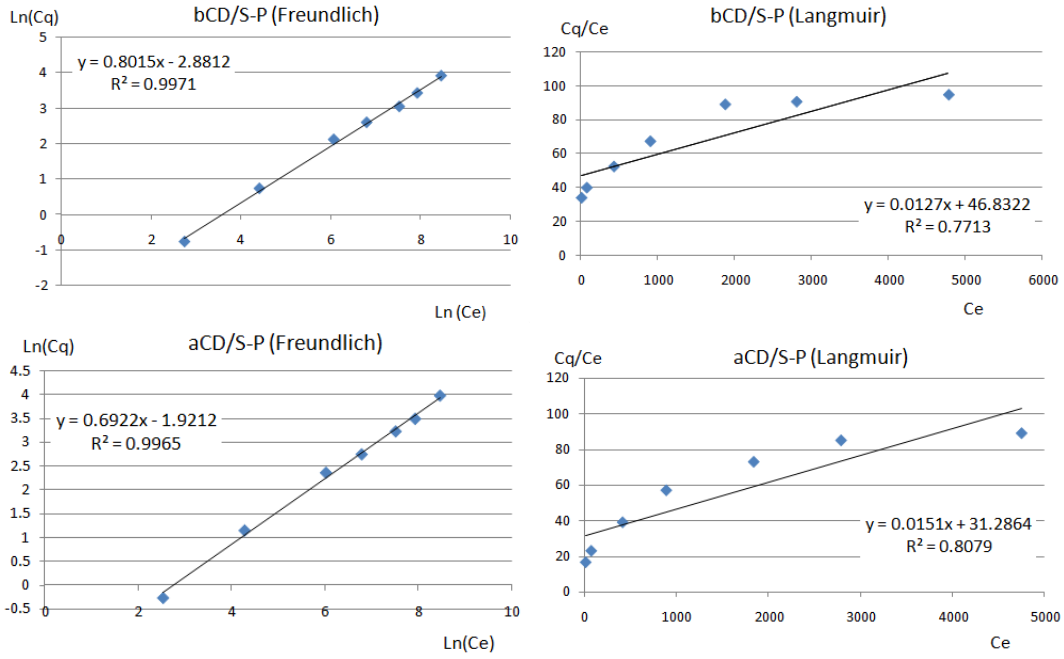

**Figure S4.** Sorption of phenol (20–5000 ppm in water) on the polymers (100 mg). Fitting of the experimental data to the linearized forms of the isotherms of Freundlich and Langmuir.

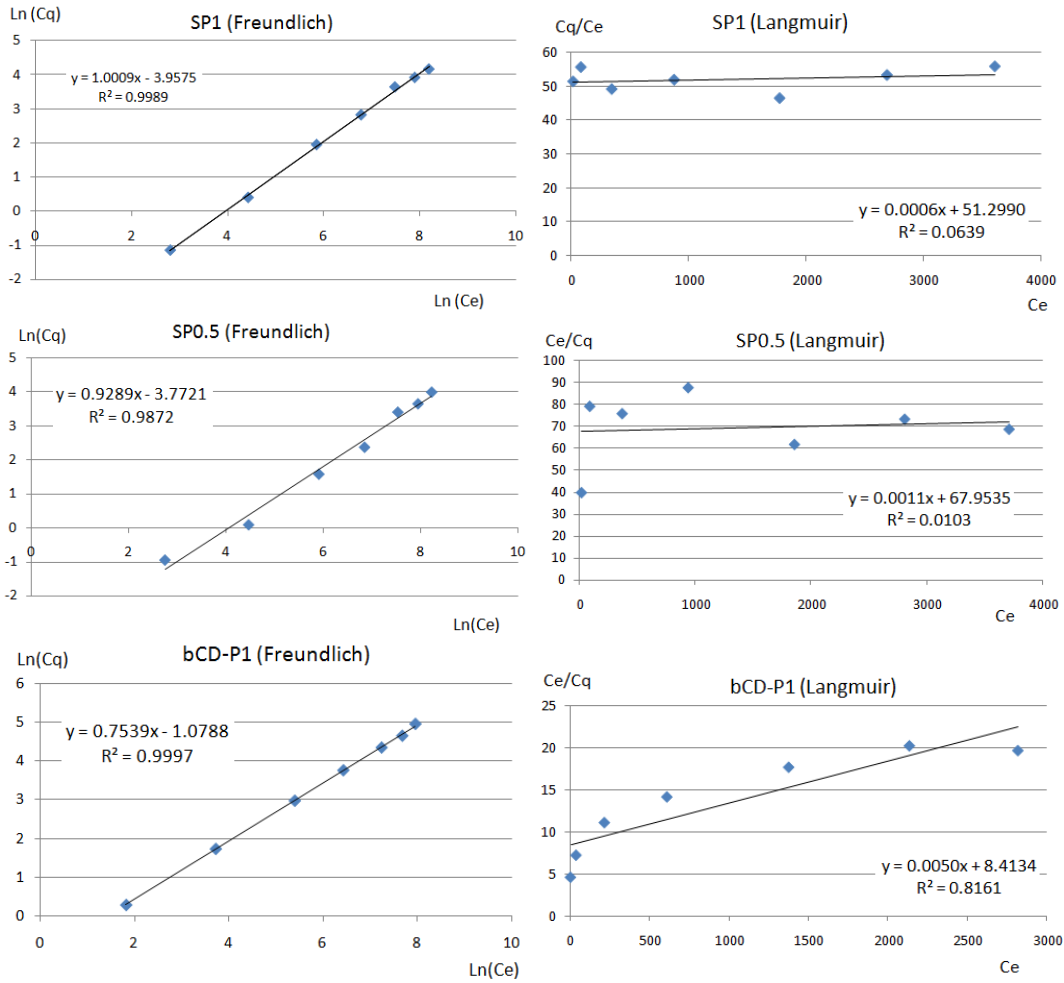

**Figure S5. Cont.**



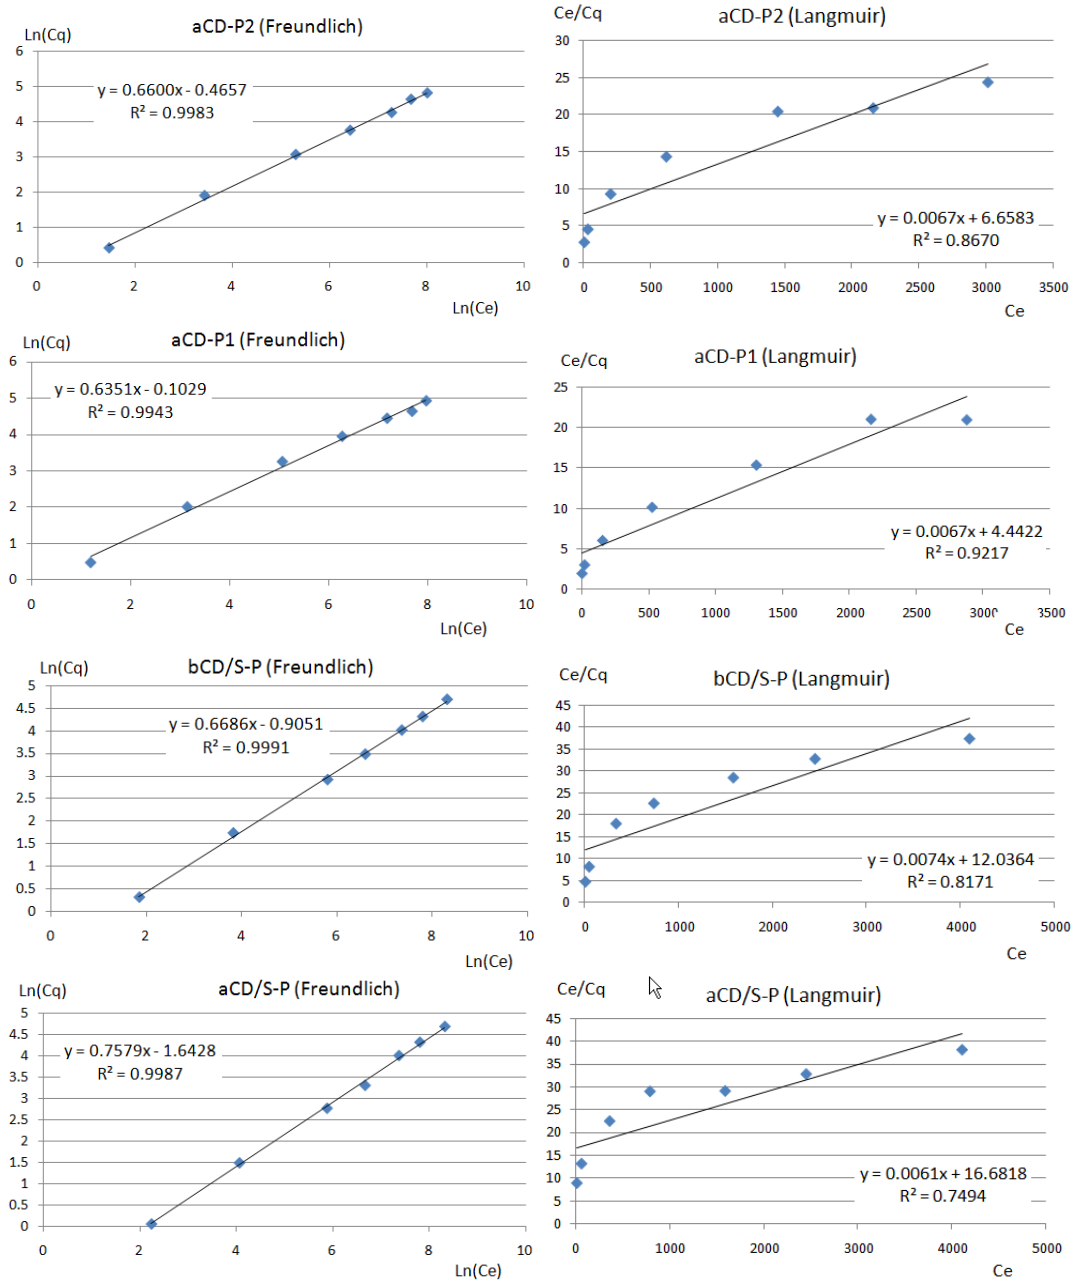

**Figure S5.** Sorption of p-nitro-phenol (20–5000 ppm in water) on the polymers (100 mg). Fitting of the experimental data to the linearized forms of the isotherms of Freundlich and Langmuir.

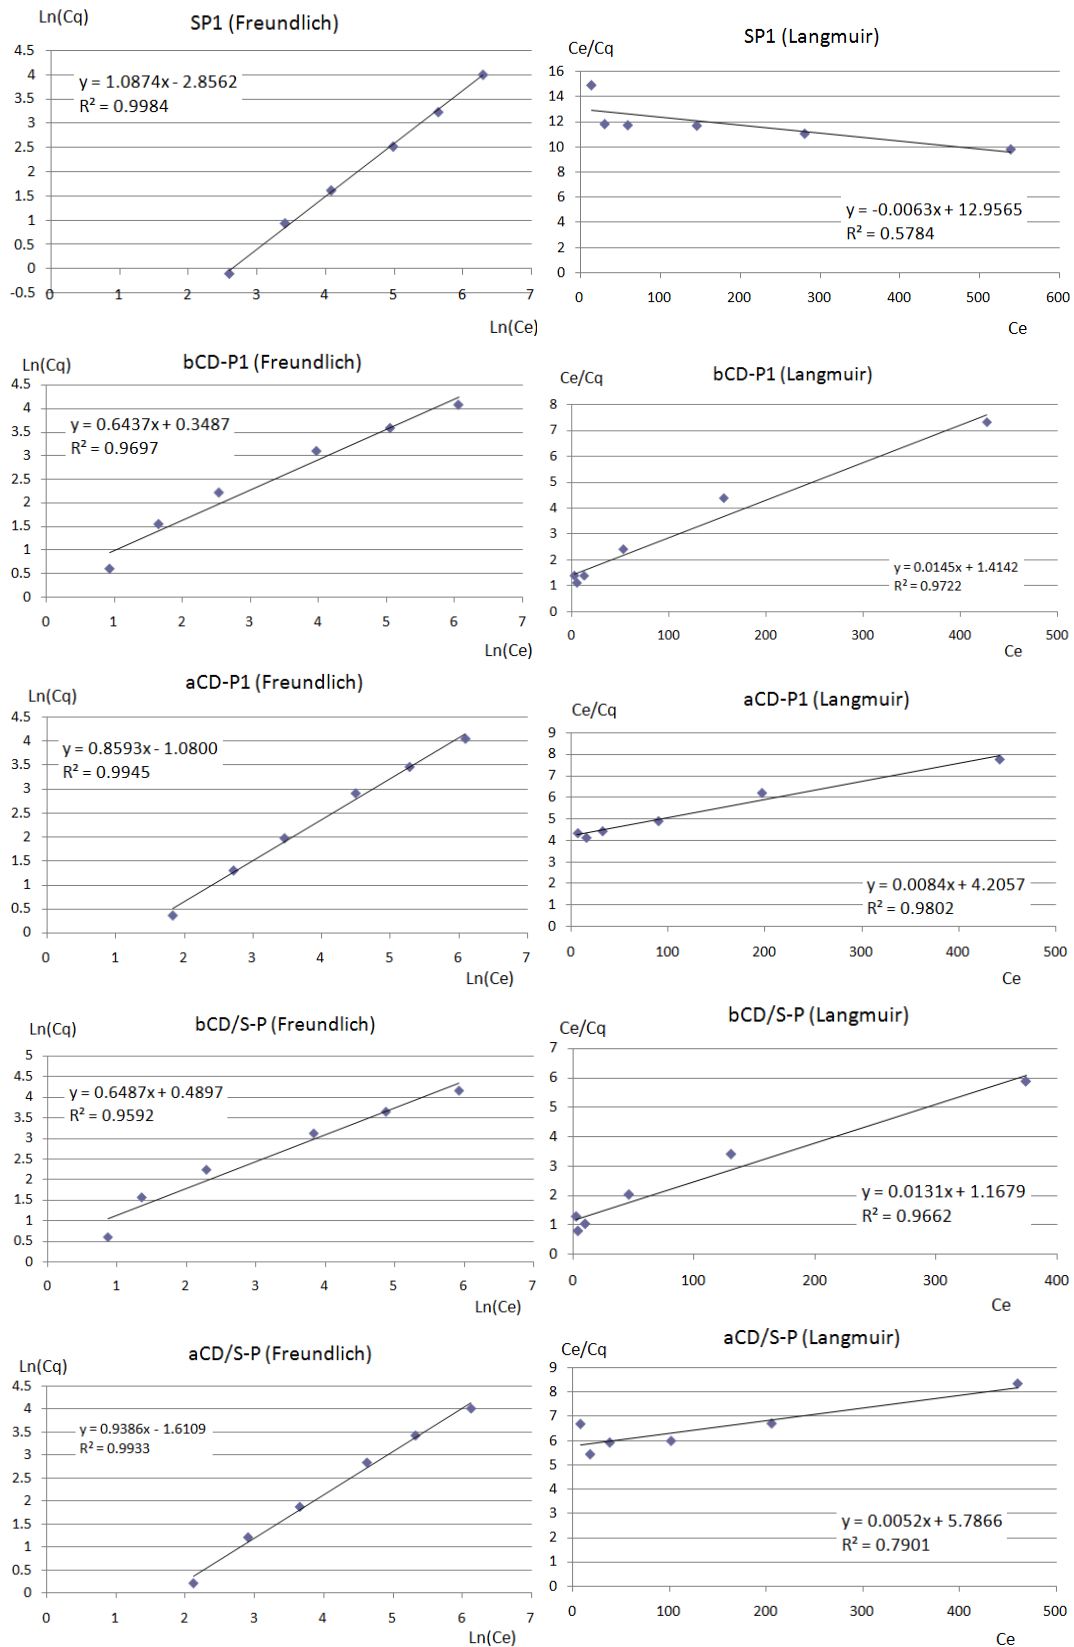

**Figure S6.** Sorption of bisphenol (20–1000 ppm in methanol: water 1:9) on the polymers (100 mg). Fitting of the experimental data to the linearized forms of the isotherms of Freundlich and Langmuir.

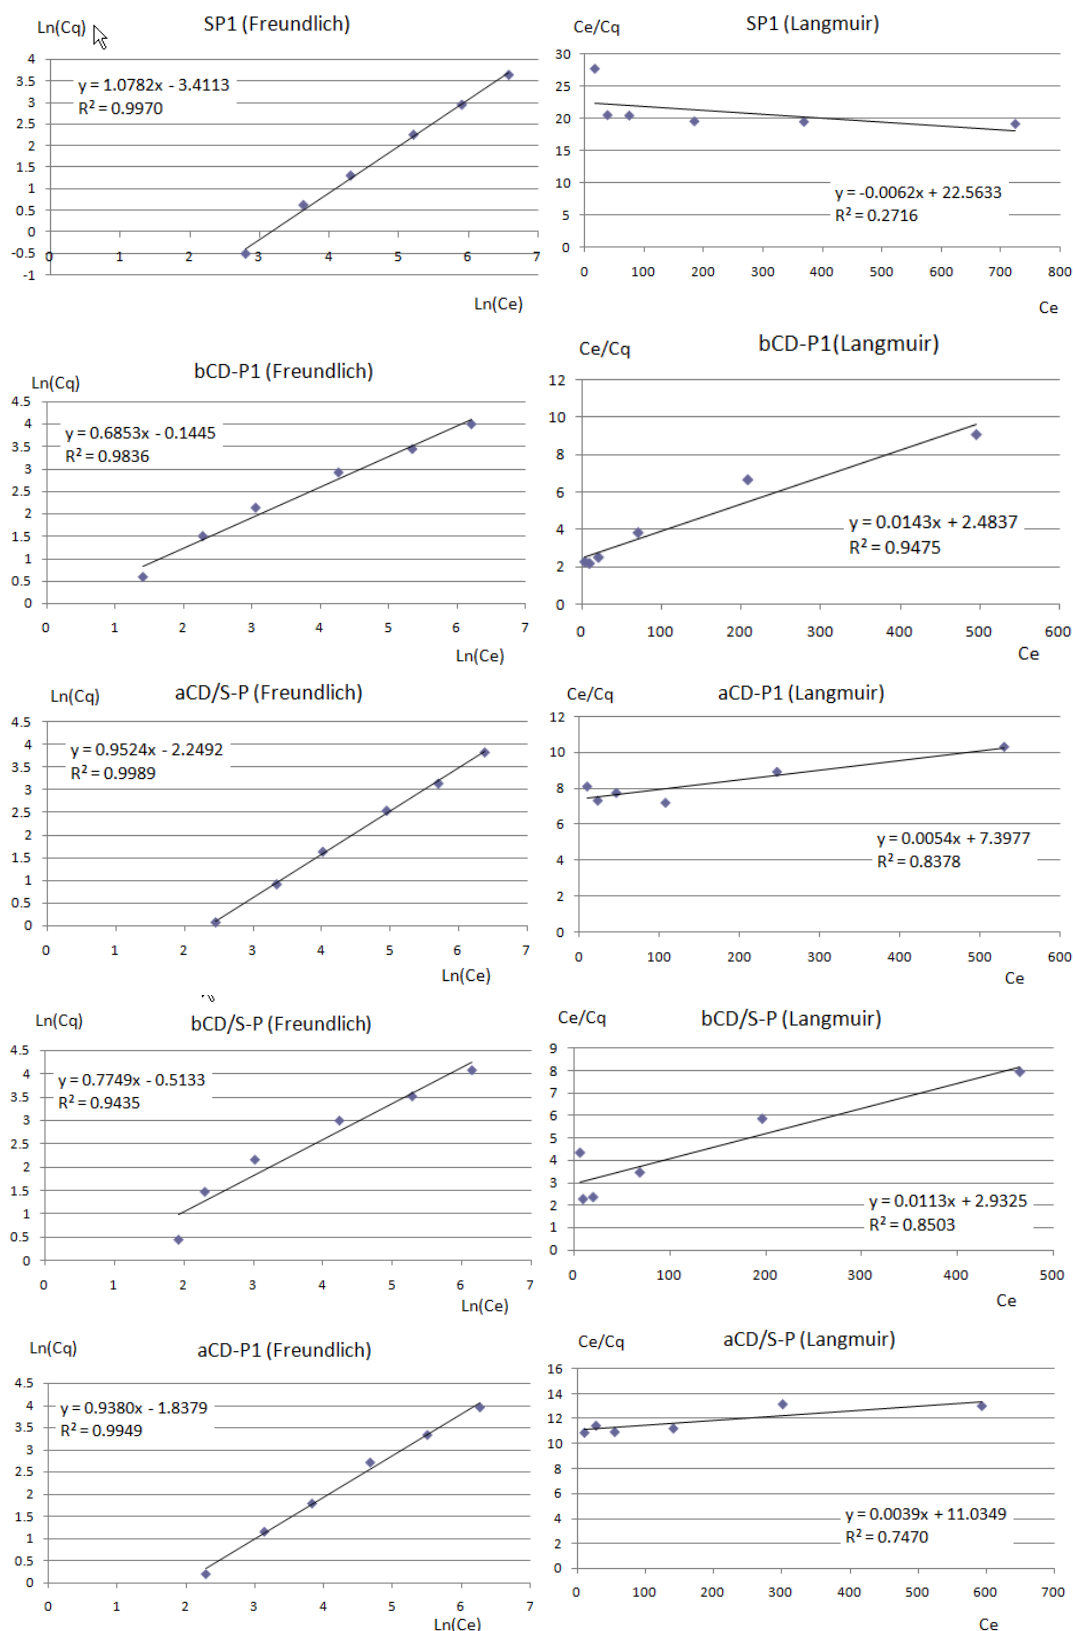

**Figure S7.** Sorption of bisphenol (20–1000 ppm in DMSO: water 1:9) on the polymers (100 mg). Fitting of the experimental data to the linearized forms of the isotherms of Freundlich and Langmuir.

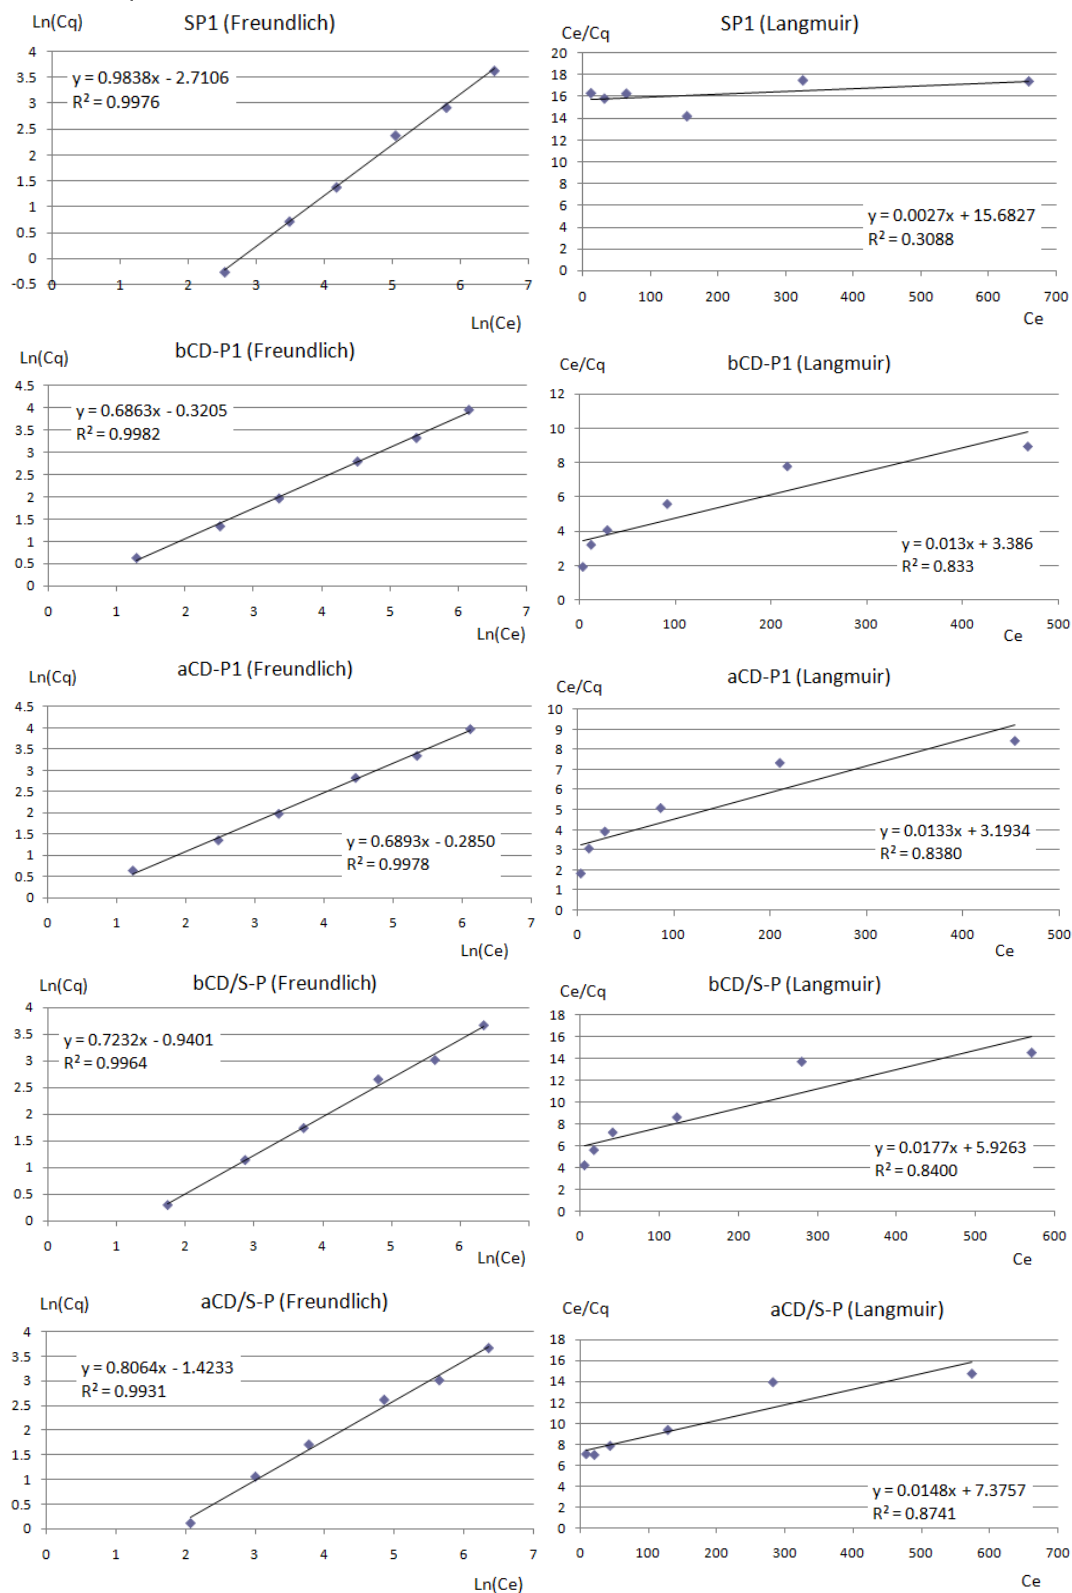

**Figure S8.** Sorption of  $\beta$ -naphthol (20–1000 ppm in methanol:water 1:9) on the polymers (100 mg). Fitting of the experimental data to the linearized forms of the isotherms of Freundlich and Langmuir.

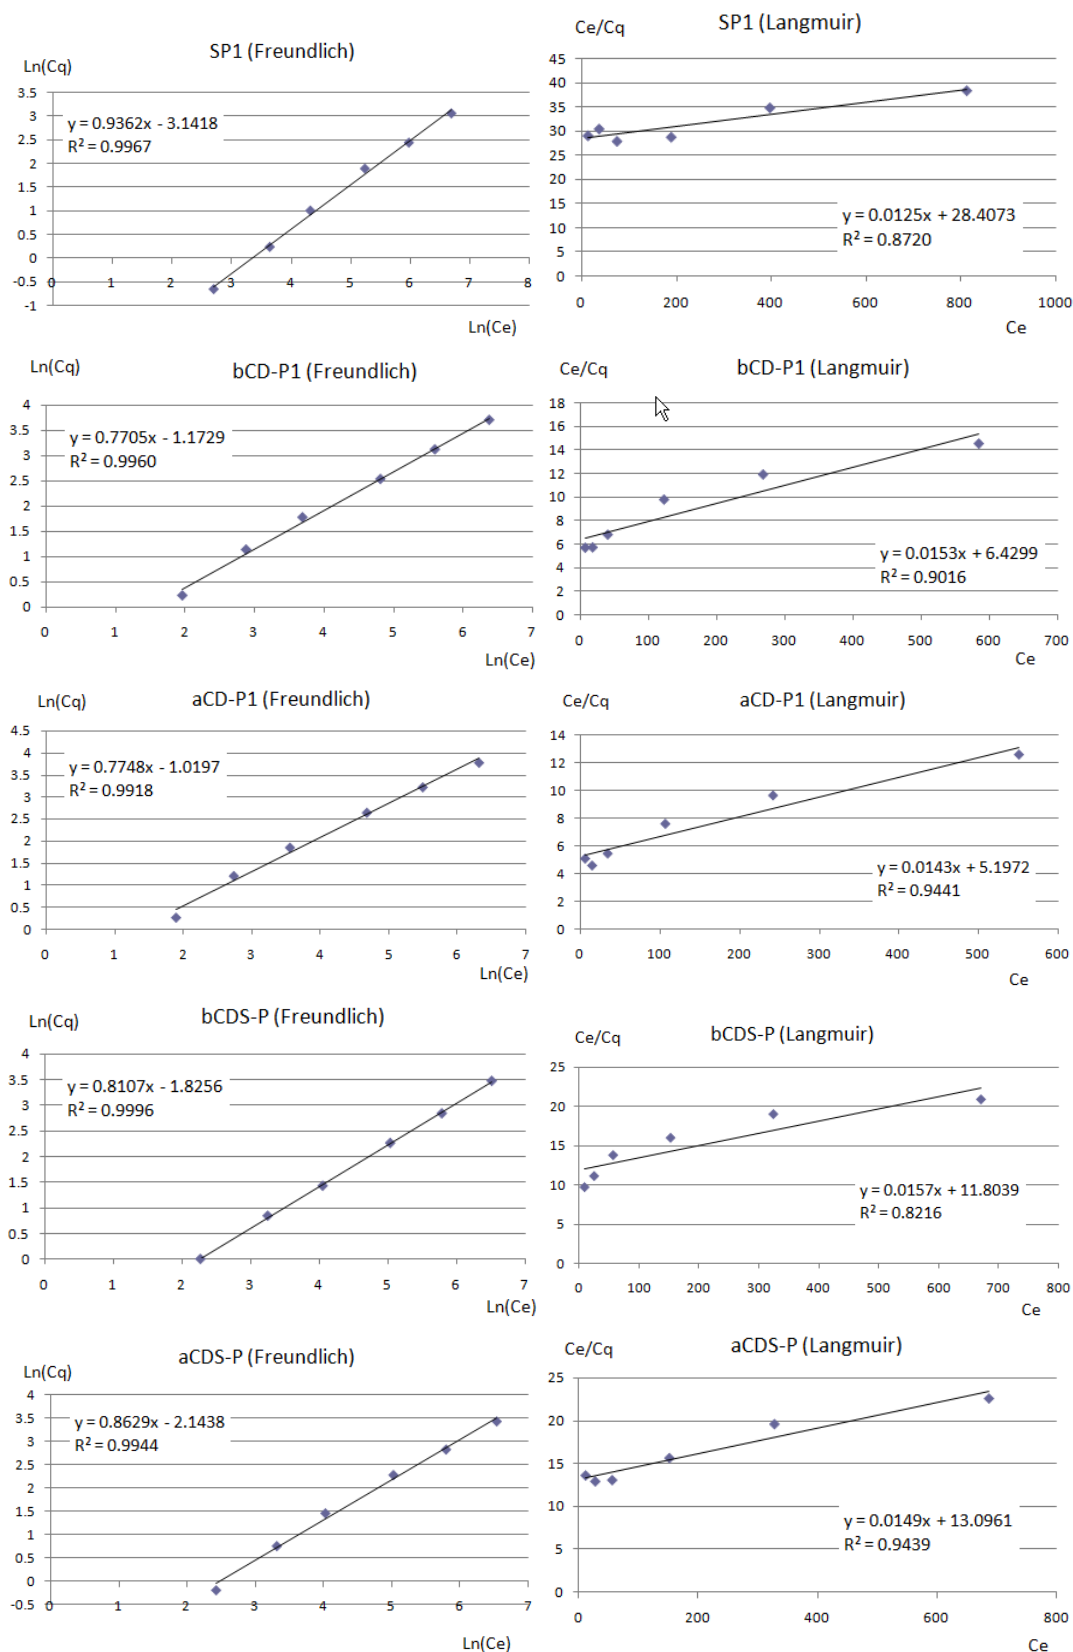

**Figure S9.** Sorption of  $\beta$ -naphthol (20–1000 ppm in DMSO:water 1:9) on the polymers (100 mg). Fitting of the experimental data to the linearized forms of the isotherms of Freundlich and Langmuir.

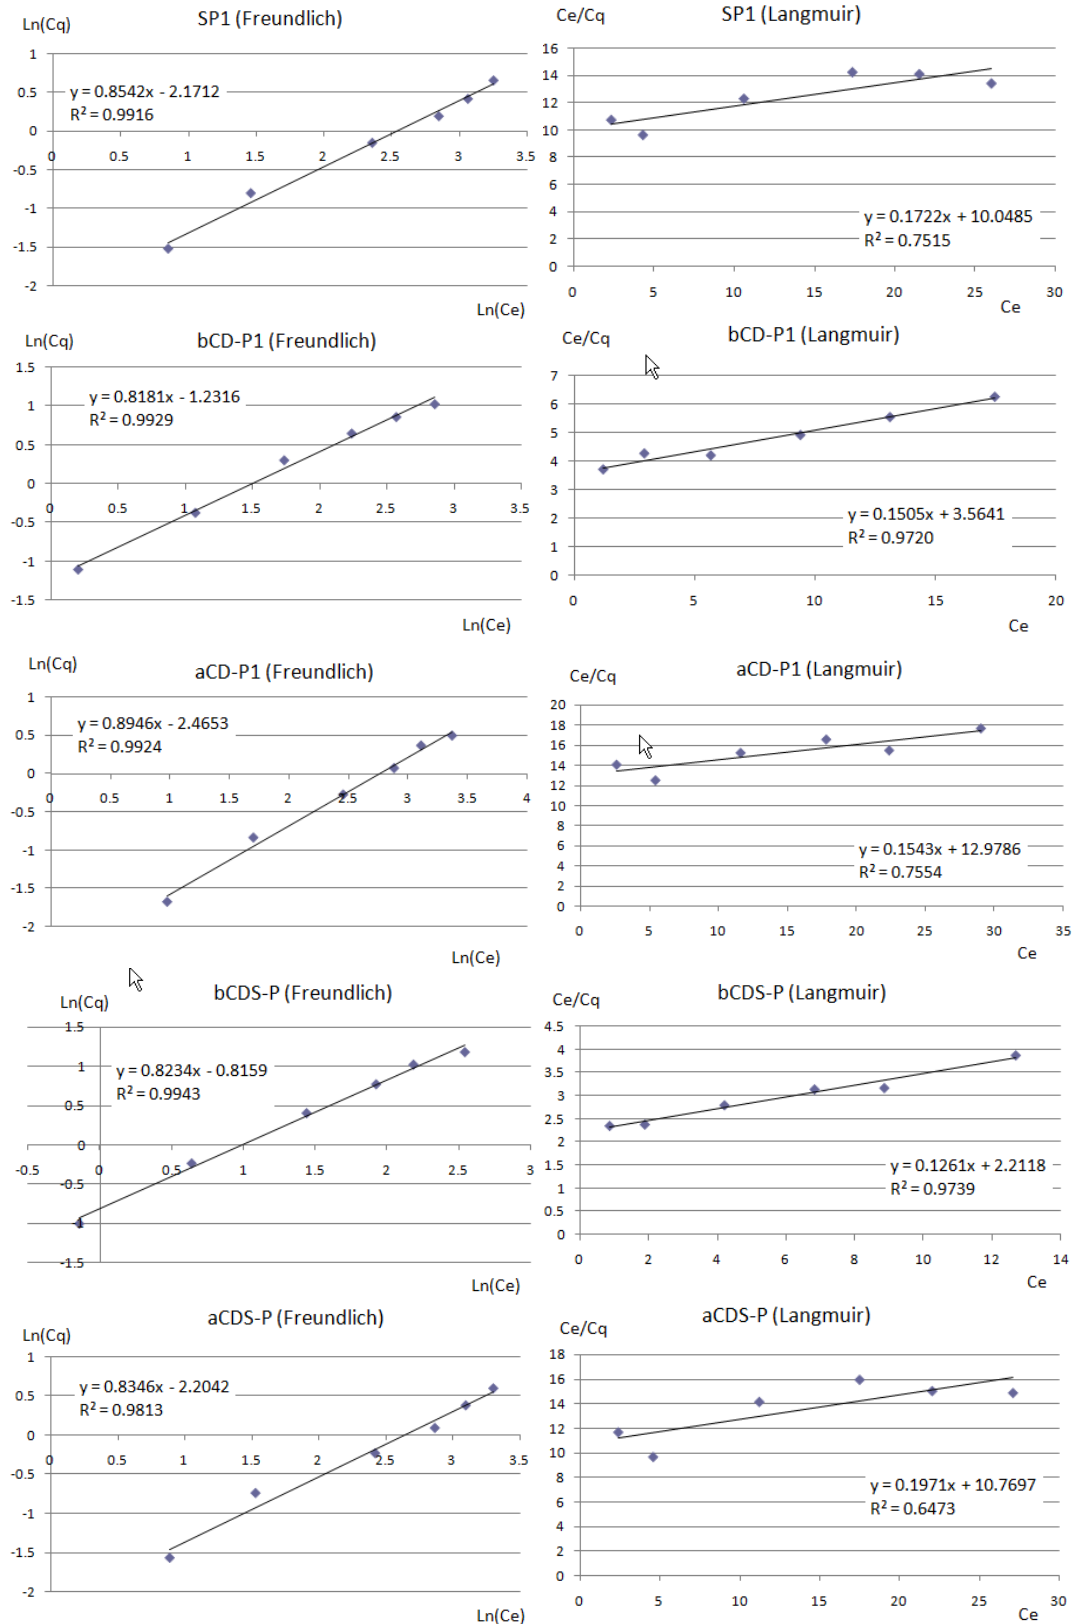

**Figure S10.** Sorption of progesterone (5–50 ppm in methanol:water 1:9) on the polymers (100 mg). Fitting of the experimental data to the linearized forms of the isotherms of Freundlich and Langmuir.

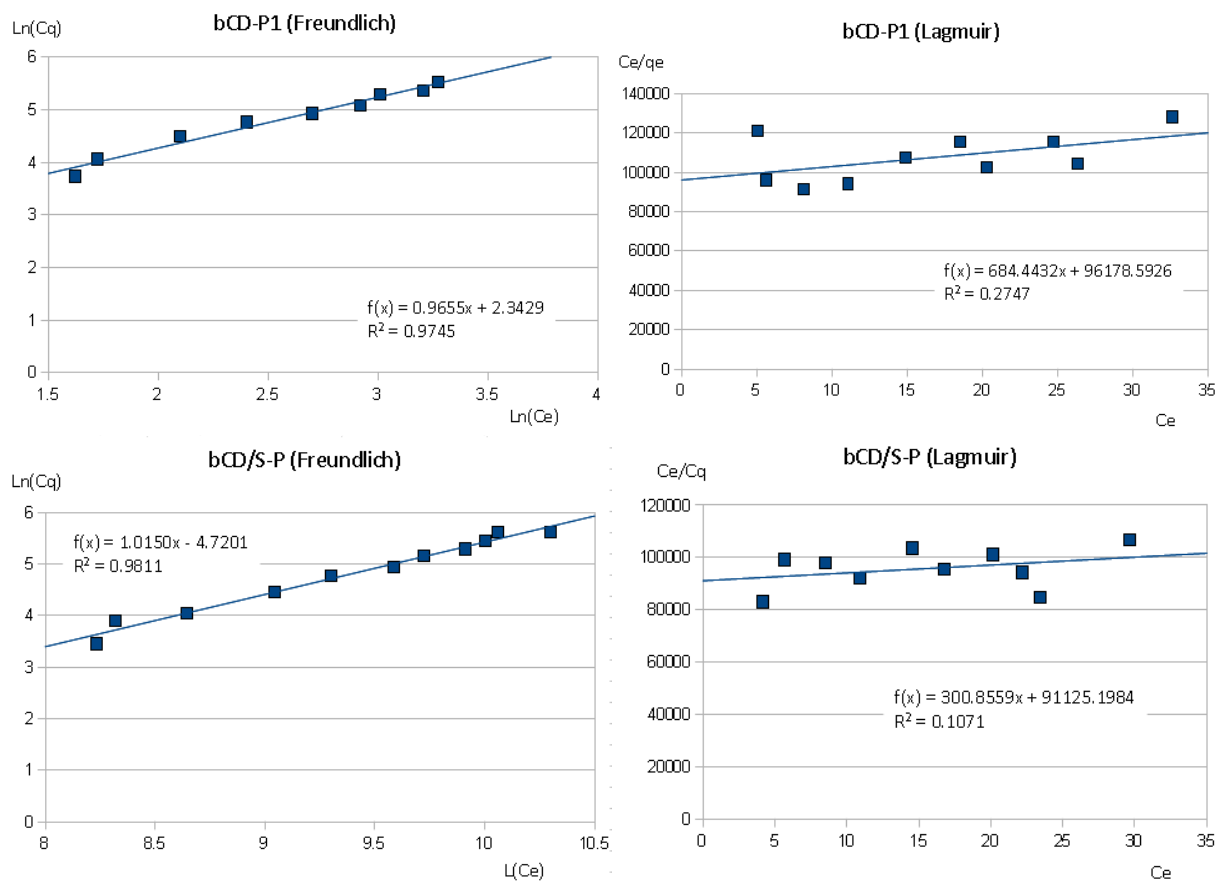

**Figure S11.** Sorption of curcumin (2–16.7 mM in ethanol) on the polymers (125 mg). Fitting of the experimental data to the linearized forms of the isotherms of Freundlich and Langmuir.
